# Supplementary material for: Highly porous, soft, and flexible vapor-phase polymerized polypyrrole–styrene–ethylene–butylene–styrene hybrid scaffold as ammonia and strain sensor
Source: Royal Society of Chemistry journal article supplement (doi:10.1039/d0ra03592k), 2020-01-01
Supplement: d0ra03592k3.pdf [file d0ra03592k3.pdf]

## **Supporting Information**

### **Highly Porous, Soft, and Flexible Vapor-Phase Polymerized Polypyrrole–Styrene-Ethylene-Butylene-Styrene Hybrid Scaffold as Ammonia and Strain Sensor**

Frances Danielle M. Fernandez<sup>a</sup>, Roshan Khadka<sup>b,\*</sup>, Jin-Heong Yim<sup>a,\*</sup>

<sup>a</sup> Division of Advanced Materials Engineering, Kongju National University, Budaedong 275, Seobuk-gu, Cheonan-si, Chungnam 31080, South Korea

<sup>b</sup> The New Zealand Institute for Plant & Food Research Limited, Private Bag 92169, Auckland 1142, New Zealand

\* Corresponding authors

Roshan Khadka

T: +64 9 925 7000

F: +64 9 925 7001

Email: [roshan.khadka@plantandfood.co.nz](mailto:roshan.khadka@plantandfood.co.nz)

Jin-Heong Yim

Tel: +82-41-521-9397

E-mail: [jhyim@kongju.ac.kr](mailto:jhyim@kongju.ac.kr)

## Contents

|                                                                                                                                                                                                                                                                                                                                     |   |
|-------------------------------------------------------------------------------------------------------------------------------------------------------------------------------------------------------------------------------------------------------------------------------------------------------------------------------------|---|
| <b>Figure S-1.</b> (A) Customized experimental setup for the measurement of the PPy-SEBS hybrid scaffold response toward NH <sub>3</sub> , which is monitored in terms of resistance change. (B) Photograph of the multi-purpose flexibility test machine. Inset photos are operation images of the machine during stretching. .... | 3 |
| <b>Figure S-2.</b> Various optical images of sugar particles (A) small, (B) medium, and (C) large.....                                                                                                                                                                                                                              | 4 |
| <b>Figure S-3.</b> Definition of axis for micro-CT images.....                                                                                                                                                                                                                                                                      | 5 |
| <b>Figure S-4.</b> PPy-SEBS scaffold's response to H <sub>2</sub> O. ....                                                                                                                                                                                                                                                           | 6 |

**Figure S-1:**

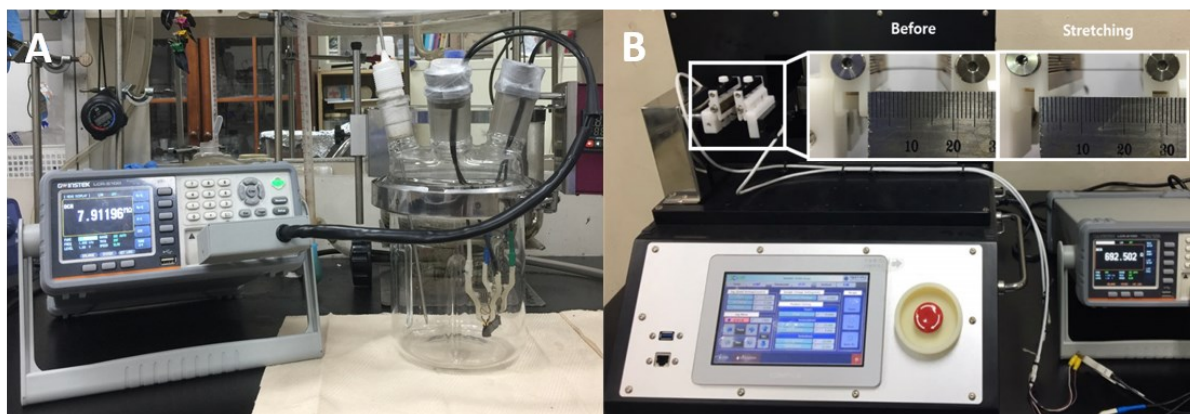

**Figure S-1.** (A) Customized experimental setup for the measurement of the PPy-SEBS hybrid scaffold response toward  $\text{NH}_3$ , which is monitored in terms of resistance change. (B) Photograph of the multi-purpose flexibility test machine. Inset photos are operation images of the machine during stretching.

**Figure S-2:**

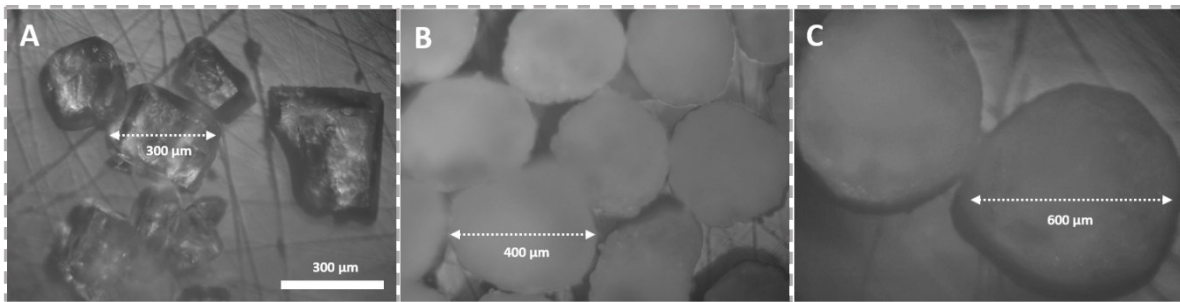

**Figure S-2.** Various optical images of sugar particles (A) small, (B) medium, and (C) large.

**Figure S-3**

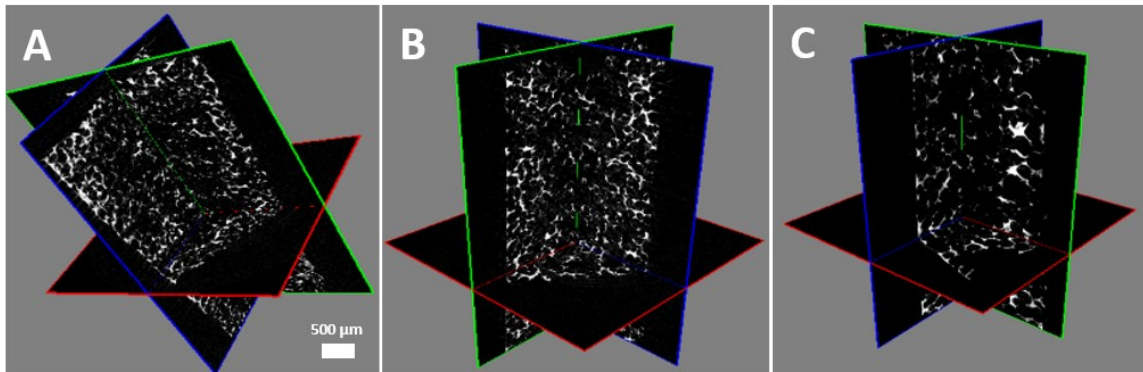

**Figure S-3.** Definition of axis for micro-CT images

Figure S-4

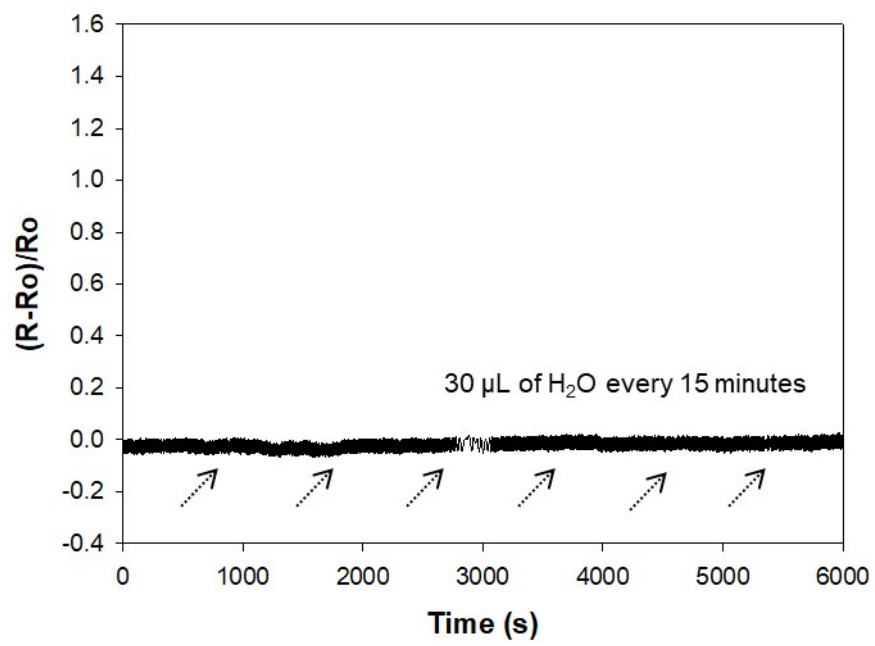

Figure S-4. PPy-SEBS scaffold's response to H<sub>2</sub>O.
